# Supplementary material for: Integrative Genomics in Combination with RNA Interference Identifies Prognostic and Functionally Relevant Gene Targets for Oral Squamous Cell Carcinoma
Source: PLoS Genet. 2013 Jan 17;9(1):e1003169. doi: 10.1371/journal.pgen.1003169 (PMC3547824; doi:10.1371/journal.pgen.1003169)
Supplement: Table S3 — Characteristics of OSCC patients in cluster 1 and cluster 2. (XLSX) [file pgen.1003169.s010.xlsx]

## Sheet: Sheet1
Table S3. Characteristics of OSCC patients in cluster 1 and cluster 2
Characteristics	Patients in Cluster 1 (n=48)*	Patients in Cluster 2 (n=85)*
Age (years)
20-39	1 (2.1)	5 (5.9)
40-49	5 (10.4)	14 (16.5)
50-59	22 (45.8)	22 (25.9)
60-88	20 (41.7)	44 (51.8)
Gender
Male	38 (79.2)	58 (68.2)
Female	10 (20.8)	27 (31.8)
AJCC
I	11 (22.9)	21 (24.7)
II	2 (4.2)	5 (5.9)
III	8 (16.7)	12 (14.1)
IV	27 (56.3)	47 (55.3)
Tumor Size
T1/T2	35 (72.9)	46 (54.1)
T3/T4	12 (25)	39 (45.9)
missing data	1 (2.1)	0 (0)
Node Status
N0	17 (35.4)	42 (49.4)
N+	30 (62.5)	43 (50.6)
missing data	1 (2.1)	0 (0)
HPV status
HPV negative	16 (33.3)	65 (76.5)
High-risk HPV positive**	31 (64.6)	17 (20)
Low-risk HPV positive***	1 (2.1)	3 (3.5)
vital status
Alive	32 (66.7)	33 (38.8)
Dead-due to OSCC	8 (16.7)	34 (40)
Dead-not due to OSCC	5 (10.4)	9 (10.6)
Dead-unknown cause	3 (6.3)	9(10.6)
* Values given are number (percentage)
**HPV types 16
***Other HPV types
